# Supplementary material for: Cat Ownership and Rural Residence Are Associated with Lyme Disease Prevalence in the Northeastern United States
Source: MDPI journal article supplement (doi:10.3390/ijerph19095618), 2022-05-05
Supplement: s1 [file s1]

Participant (Subject) #: \_\_\_\_\_

## **UNDERSTANDING THE LIFESTYLE IMPACTS OF LYME DISEASE SURVEY FORM**

Title of research project: Understanding the Impact of Emerging Infectious Diseases in Human Populations: the case for Lyme disease

---

### **SECTION A**

1. What gender are you?  
☐ Male    ☐ Female
2. What is your age? \_\_\_\_\_
3. What state do you live in? \_\_\_\_\_
4. What county do you live in? \_\_\_\_\_
5. What kind of community do you live in?  
☐ Urban/city    ☐ Sub-urban/large town    ☐ Small town/village  
☐ Rural/country    ☐ Other (please specify): \_\_\_\_\_
6. What is your primary occupational environment?  
☐ Farm/agriculture    ☐ Office Building    ☐ Work from home  
☐ Factory work    ☐ School    ☐ Forestry/park service  
☐ Hospital/healthcare    ☐ Machine shop/mechanic    ☐ Construction  
☐ Animal/Veterinary clinic    ☐ Quarry/gas drilling  
☐ Other (please specify): \_\_\_\_\_
7. How do you describe your ethnicity?  
☐ White (Caucasian)    ☐ African American    ☐ Australasian  
☐ Asian    ☐ African    ☐ Hawaiian/Pacific Islander  
☐ Latino    ☐ Other (please specify): \_\_\_\_\_
8. Do you have any household pets? (i.e., pets that live INSIDE your home?)  
☐ Yes    ☐ No
9. If you own a household pet, what pets do you own? Check all that apply  
☐ Not applicable    ☐ Dog(s)    ☐ Cat(s)  
☐ Other (please specify): \_\_\_\_\_

Participant (Subject) #: \_\_\_\_\_

10. How often do you exercise?

- ☐ Never                      ☐ Less than once per month                      ☐ 1-3 times per month  
☐ 1-3 times per week                      ☐ 4-6 times per week                      ☐ Everyday

11. How often do you engage in social activities (i.e. go out with friends, etc.)?

- ☐ Never                      ☐ Less than once per month                      ☐ 1-3 times per month  
☐ 1-3 times per week                      ☐ 4-6 times per week                      ☐ Everyday

12. How many meals do you typically eat per day?

- ☐ 1 meal                      ☐ 2 meals                      ☐ 3 meals  
☐ 4 meals                      ☐ 5 meals                      ☐ 6+ meals

13. How many hours do you typically sleep in a 24 hour period?

- ☐ 1-3                      ☐ 4-6                      ☐ 7-9  
☐ 10-12                      ☐ 13-15                      ☐ 16+

14. How often do you feel tired or lethargic after a typical night sleep?

- ☐ Never                      ☐ Rarely                      ☐ Sometimes  
☐ Often                      ☐ Always

15. How would you categorize your overall health?

- ☐ Very Poor                      ☐ Poor                      ☐ Neither good nor poor  
☐ Good                      ☐ Very good

16. How would you assess your overall health compared to that of others of your own age?

- ☐ Much worse                      ☐ Slightly worse                      ☐ Neither better nor worse  
☐ Slightly better                      ☐ Much better

17. How often do you feel fearful?

- |        |                       |                       |                       |                       |                       |       |
|--------|-----------------------|-----------------------|-----------------------|-----------------------|-----------------------|-------|
|        | 1                     | 2                     | 3                     | 4                     | 5                     |       |
| Always | <input type="radio"/> | Never |

18. How often do you feel angry?

- |        |                       |                       |                       |                       |                       |       |
|--------|-----------------------|-----------------------|-----------------------|-----------------------|-----------------------|-------|
|        | 1                     | 2                     | 3                     | 4                     | 5                     |       |
| Always | <input type="radio"/> | Never |

Participant (Subject) #: \_\_\_\_\_

19. How often do you feel sad?

Always      <sup>1</sup>  
☐              <sup>2</sup>  
☐              <sup>3</sup>  
☐              <sup>4</sup>  
☐              <sup>5</sup>  
☐      Never

20. How often do you feel happy?

Always      <sup>1</sup>  
☐              <sup>2</sup>  
☐              <sup>3</sup>  
☐              <sup>4</sup>  
☐              <sup>5</sup>  
☐      Never

21. How often do you feel anticipation?

Always      <sup>1</sup>  
☐              <sup>2</sup>  
☐              <sup>3</sup>  
☐              <sup>4</sup>  
☐              <sup>5</sup>  
☐      Never

22. On average, how many times per year do you visit the doctor (primary care physician)?

☐ 0      ☐ 1-2      ☐ 3-5      ☐ 6-8  
☐ 9-11      ☐ 12-14      ☐ 15+

23. Do you know someone (other than yourself) that has been diagnosed with Lyme disease (by a physician)?

☐ Yes      ☐ No

24. If you know someone that's been diagnosed with Lyme disease, what is their relation to you? Check all that apply.

☐ Not applicable      ☐ Spouse      ☐ Child  
☐ Sibling      ☐ Parent      ☐ Relative (not immediate)  
☐ Friend      ☐ Acquaintance  
☐ Other (please specify): \_\_\_\_\_

25. How often do you wear bug spray (containing DEET) when you are outside (i.e. gardening, hiking, walking, etc.)?

☐ Never      ☐ Rarely      ☐ Sometimes  
☐ Often      ☐ Always

26. How often do you check yourself for ticks after being outside (i.e. gardening, hiking, walking, etc.)?

☐ Never      ☐ Rarely      ☐ Sometimes  
☐ Often      ☐ Always

Participant (Subject) #: \_\_\_\_\_

27. Have you ever been diagnosed with Lyme disease by a physician?

☐ Yes    ☐ No

*(If NO, please continue to **SECTION C**. If YES, please continue to **SECTION B**)*

## **SECTION B**

28. When were you diagnosed with Lyme disease (for the first time if you've had multiple diagnoses) (year; i.e. 2003)? \_\_\_\_\_

29. If you have been diagnosed with Lyme, were you treated by a physician?

☐ Yes    ☐ No

30. Did your symptoms clear after initial treatment?

☐ Yes    ☐ No

31. If your symptoms did NOT clear after initial treatment, were you treated again?

☐ Not applicable    ☐ Yes    ☐ No

32. Approximately how long did your symptoms last from the time you were first diagnosed with Lyme disease?

☐ 1-2 weeks    ☐ 3-4 weeks    ☐ 2-4 months    ☐ 4-6 months

☐ 6-8 months    ☐ 8-10 months    ☐ 10-12 months    ☐ 1-2 years

☐ 2-5 years    ☐ 5+ years    ☐ My symptoms are still occurring

33. What symptoms did you experience? Check all that apply.

☐ Erythema migrans rash    ☐ Fever    ☐ Knee joint pain

☐ Hip joint pain    ☐ Ankle joint pain    ☐ Elbow joint pain

☐ Shoulder joint pain    ☐ Wrist joint pain    ☐ Other joint pain

☐ Neck pain    ☐ Muscle weakness    ☐ Leg muscle cramps

☐ Back muscle cramps    ☐ Arm muscle cramps    ☐ Other muscle cramps

☐ Facial tingling    ☐ Facial paralysis    ☐ Impaired memory

☐ Sore throat    ☐ Unusual hair loss    ☐ Difficulty comprehending

☐ Absent mindedness    ☐ Confusion    ☐ Dizziness

☐ Light headedness    ☐ Misspeaking    ☐ Anxiousness

☐ Unusual fatigue    ☐ Mood swings    ☐ Nausea

Participant (Subject) #: \_\_\_\_\_

☐ Diarrhea

☐ Heart burn

☐ Other (please specify): \_\_\_\_\_

34. Were you ever diagnosed with Post-Treatment Lyme Disease Syndrome by a physician?

☐ Yes ☐ No

35. Can you recall ever being bitten by a tick?

☐ Yes ☐ No

36. How often did you exercise **BEFORE** being diagnosed with Lyme disease?

☐ Never ☐ Less than once per month ☐ 1-3 times per month

☐ 1-4 times per week ☐ 4-6 times per week ☐ Everyday

37. How often do you exercise now, **AFTER** being diagnosed with Lyme disease?

☐ Never ☐ Less than once per month ☐ 1-3 times per month

☐ 1-3 times per week ☐ 4-6 times per week ☐ Everyday

38. How often did you engage in social activities (i.e. go out with friends, etc.) **BEFORE** being diagnosed with Lyme disease?

☐ Never ☐ Less than once per month ☐ 1-3 times per month

☐ 1-3 times per week ☐ 4-6 times per week ☐ Everyday

39. How often do you engage in social activities (i.e. go out with friends, etc.) now, **AFTER** being diagnosed with Lyme disease?

☐ Never ☐ Less than once per month ☐ 1-3 times per month

☐ 1-3 times per week ☐ 4-6 times per week ☐ Everyday

40. How many meals did you typically eat per day **BEFORE** being diagnosed with Lyme disease?

☐ 1 meal ☐ 2 meals ☐ 3 meals

☐ 4 meals ☐ 5 meals ☐ 6+ meals

41. How many meals do you typically eat per day now, **AFTER** being diagnosed with Lyme disease?

☐ 1 meal ☐ 2 meals ☐ 3 meals

☐ 4 meals ☐ 5 meals ☐ 6+ meals

Participant (Subject) #: \_\_\_\_\_

42. How many hours did you typically sleep in a 24 hour period **BEFORE** being diagnosed with Lyme disease?

☐ 1-3

☐ 4-6

☐ 7-9

☐ 10-12

☐ 13-15

☐ 16+

43. How many hours do you typically sleep in a 24 hour period now, **AFTER** being diagnosed with Lyme disease?

☐ 1-3

☐ 4-6

☐ 7-9

☐ 10-12

☐ 13-15

☐ 16+

44. How often did you feel tired or lethargic after a typical night sleep **BEFORE** being diagnosed with Lyme disease?

☐ Never

☐ Rarely

☐ Sometimes

☐ Often

☐ Always

45. How often do you feel tired or lethargic after a typical night sleep now, **AFTER** being diagnosed with Lyme disease?

☐ Never

☐ Rarely

☐ Sometimes

☐ Often

☐ Always

46. How would you categorize your overall health **BEFORE** being diagnosed with Lyme disease?

☐ Very Poor

☐ Poor

☐ Neither good nor poor

☐ Good

☐ Very good

47. How would you categorize your overall health **AFTER** being diagnosed with Lyme disease?

☐ Very Poor

☐ Poor

☐ Neither good nor poor

☐ Good

☐ Very good

48. How would you assess your overall health compared to that of others of your own age **BEFORE** being diagnosed with Lyme disease?

☐ Much worse

☐ Slightly worse

☐ Neither better nor worse

☐ Slightly better

☐ Much better

49. How would you assess your overall health compared to that of others of your own age **AFTER** being diagnosed with Lyme disease?

Participant (Subject) #: \_\_\_\_\_

☐ Much worse

☐ Slightly worse

☐ Neither better nor worse

☐ Slightly better

☐ Much better

50. How often did you feel fearful **BEFORE** being diagnosed with Lyme disease?

|        |                       |                       |                       |                       |                       |       |
|--------|-----------------------|-----------------------|-----------------------|-----------------------|-----------------------|-------|
|        | 1                     | 2                     | 3                     | 4                     | 5                     |       |
| Always | <input type="radio"/> | Never |

51. How often do you feel fearful now, **AFTER** being diagnosed with Lyme disease?

|        |                       |                       |                       |                       |                       |       |
|--------|-----------------------|-----------------------|-----------------------|-----------------------|-----------------------|-------|
|        | 1                     | 2                     | 3                     | 4                     | 5                     |       |
| Always | <input type="radio"/> | Never |

52. How often did you feel angry **BEFORE** being diagnosed with Lyme disease?

|        |                       |                       |                       |                       |                       |       |
|--------|-----------------------|-----------------------|-----------------------|-----------------------|-----------------------|-------|
|        | 1                     | 2                     | 3                     | 4                     | 5                     |       |
| Always | <input type="radio"/> | Never |

53. How often do you feel angry now, **AFTER** being diagnosed with Lyme disease?

|        |                       |                       |                       |                       |                       |       |
|--------|-----------------------|-----------------------|-----------------------|-----------------------|-----------------------|-------|
|        | 1                     | 2                     | 3                     | 4                     | 5                     |       |
| Always | <input type="radio"/> | Never |

54. How often did you feel sad **BEFORE** being diagnosed with Lyme disease?

|        |                       |                       |                       |                       |                       |       |
|--------|-----------------------|-----------------------|-----------------------|-----------------------|-----------------------|-------|
|        | 1                     | 2                     | 3                     | 4                     | 5                     |       |
| Always | <input type="radio"/> | Never |

55. How often do you feel sad now, **AFTER** being diagnosed with Lyme disease?

|        |                       |                       |                       |                       |                       |       |
|--------|-----------------------|-----------------------|-----------------------|-----------------------|-----------------------|-------|
|        | 1                     | 2                     | 3                     | 4                     | 5                     |       |
| Always | <input type="radio"/> | Never |

56. How often did you feel happy **BEFORE** being diagnosed with Lyme disease?

|        |                       |                       |                       |                       |                       |       |
|--------|-----------------------|-----------------------|-----------------------|-----------------------|-----------------------|-------|
|        | 1                     | 2                     | 3                     | 4                     | 5                     |       |
| Always | <input type="radio"/> | Never |

57. How often do you feel happy now, **AFTER** being diagnosed with Lyme disease?

|        |                       |                       |                       |                       |                       |       |
|--------|-----------------------|-----------------------|-----------------------|-----------------------|-----------------------|-------|
|        | 1                     | 2                     | 3                     | 4                     | 5                     |       |
| Always | <input type="radio"/> | Never |

58. How often did you feel anticipation **BEFORE** being diagnosed with Lyme disease?

|        |                       |                       |                       |                       |                       |       |
|--------|-----------------------|-----------------------|-----------------------|-----------------------|-----------------------|-------|
|        | 1                     | 2                     | 3                     | 4                     | 5                     |       |
| Always | <input type="radio"/> | Never |

59. How often do you feel anticipation now, **AFTER** being diagnosed with Lyme disease?

|   |   |   |   |   |
|---|---|---|---|---|
| 1 | 2 | 3 | 4 | 5 |
|---|---|---|---|---|

Participant (Subject) #: \_\_\_\_\_

Always    ☐                      ☐                      ☐                      ☐                      ☐    Never

60. On average, how many times per year did you visit the doctor (primary care physician or specialist) **BEFORE** being diagnosed with Lyme disease?

☐ 0            ☐ 1-2            ☐ 3-5            ☐ 6-8

☐ 9-11    ☐ 12-14    ☐ 15+

61. On average, how many times per year do you visit the doctor (primary care physician or specialist) now, **AFTER** being diagnosed with Lyme disease?

☐ 0            ☐ 1-2            ☐ 3-5            ☐ 6-8

☐ 9-11    ☐ 12-14    ☐ 15+

62. How often did you wear bug spray (containing DEET) when you are outside (i.e. gardening, hiking, walking, etc.) **BEFORE** being diagnosed with Lyme disease?

☐ Never                                      ☐ Rarely                                      ☐ Sometimes

☐ Often                                      ☐ Always

63. How often do you wear bug spray (containing DEET) when you are outside (i.e. gardening, hiking, walking, etc.) **AFTER** being diagnosed with Lyme disease?

☐ Never                                      ☐ Rarely                                      ☐ Sometimes

☐ Often                                      ☐ Always

64. How often did you check yourself for ticks after being outside (i.e. gardening, hiking, walking, etc.) **BEFORE** being diagnosed with Lyme disease?

☐ Never                                      ☐ Rarely                                      ☐ Sometimes

☐ Often                                      ☐ Always

65. How often do you check yourself for ticks after being outside (i.e. gardening, hiking, walking, etc.) **AFTER** being diagnosed with Lyme disease?

☐ Never                                      ☐ Rarely                                      ☐ Sometimes

☐ Often                                      ☐ Always

## **SECTION C**

66. Would you like to receive an email update when data analyses are complete?

a. Yes (please provide email address): \_\_\_\_\_

b. No

Thank you for participating in this survey. The information you provide will assist in gaining a better understanding of Lyme disease and the impact it has on human health.



Participant (Subject) #: \_\_\_\_\_

Should you have any questions, please do not hesitate to contact Amanda Roome at [aroome1@binghamton.edu](mailto:aroome1@binghamton.edu).
